# Supplementary material for: Novel Antifungal Activity of Lolium-Associated Epichloë Endophytes
Source: PubMed Central journal article supplement (PMC7355949; doi:10.3390/microorganisms8060955), 2020-06-24
Supplement: microorganisms-08-00955-s001.pdf [file microorganisms-08-00955-s001.pdf]

## Supplementary material

**Table S1:** Antifungal activity of *Epichloë* spp. endophytes against selected grass pathogens.

| Endophyte strain |               | Pathogen                          |                               |                          |
|------------------|---------------|-----------------------------------|-------------------------------|--------------------------|
| Strain ID        | Taxon         | <i>Colletotrichum graminicola</i> | <i>Ceratobasidium cereale</i> | <i>Drechslera brizae</i> |
| 440364           | <i>FaTG-1</i> | Strong                            | Strong                        | Strong                   |
| AR542            | <i>FaTG-1</i> | Moderate                          | Strong                        | Strong                   |
| E34              | <i>FaTG-1</i> | Weak                              | Strong                        | Weak                     |
| NEA13            | <i>FaTG-1</i> | Moderate                          | Strong                        | Strong                   |
| NEA14            | <i>FaTG-1</i> | Strong                            | Strong                        | Moderate                 |
| NEA15            | <i>FaTG-1</i> | Moderate                          | Strong                        | Strong                   |
| NEA16            | <i>FaTG-1</i> | Moderate                          | Strong                        | Strong                   |
| NEA22            | <i>FaTG-1</i> | Strong                            | Moderate                      | Moderate                 |
| NEA27            | <i>FaTG-1</i> | Weak                              | Weak                          | Moderate                 |
| NEA30            | <i>FaTG-1</i> | Moderate                          | Strong                        | Strong                   |
| NEA17            | <i>FaTG-2</i> | Moderate                          | Strong                        | Strong                   |
| NEA34            | <i>FaTG-2</i> | Moderate                          | Strong                        | Strong                   |
| 610918           | <i>FaTG-3</i> | Moderate                          | Strong                        | Strong                   |
| AR510            | <i>FaTG-3</i> | Weak                              | Strong                        | Not tested               |
| NEA21            | <i>FaTG-3</i> | Moderate                          | Moderate                      | Strong                   |
| NEA23            | <i>FaTG-3</i> | Moderate                          | Strong                        | Strong                   |
| NEA33            | <i>FaTG-4</i> | Moderate                          | Moderate                      | Weak                     |
| NEA18            | <i>FaTG-5</i> | Moderate                          | Strong                        | Strong                   |
| NEA19            | <i>FaTG-5</i> | Moderate                          | Strong                        | Strong                   |
| 15285            | <i>LpTG-1</i> | Not tested                        | Not tested                    | Weak                     |
| AR1              | <i>LpTG-1</i> | Weak                              | Moderate                      | Weak                     |
| NEA10            | <i>LpTG-1</i> | Weak                              | Weak                          | Weak                     |
| NEA3             | <i>LpTG-1</i> | Weak                              | Weak                          | Weak                     |
| RU03001-60_E09   | <i>LpTG-1</i> | Weak                              | Strong                        | Moderate                 |
| SE               | <i>LpTG-1</i> | Weak                              | Strong                        | Strong                   |
| 18-C1            | <i>LpTG-2</i> | Weak                              | Not tested                    | Not tested               |
| NEA11            | <i>LpTG-2</i> | Weak                              | Moderate                      | Strong                   |
| FR15598_15310    | <i>LpTG-3</i> | Strong                            | Strong                        | Moderate                 |
| NEA12            | <i>LpTG-3</i> | Strong                            | Strong                        | Moderate                 |
| E1               | <i>LpTG-4</i> | Weak                              | Moderate                      | Weak                     |

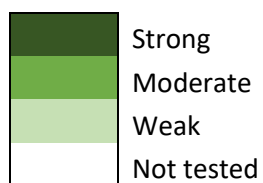

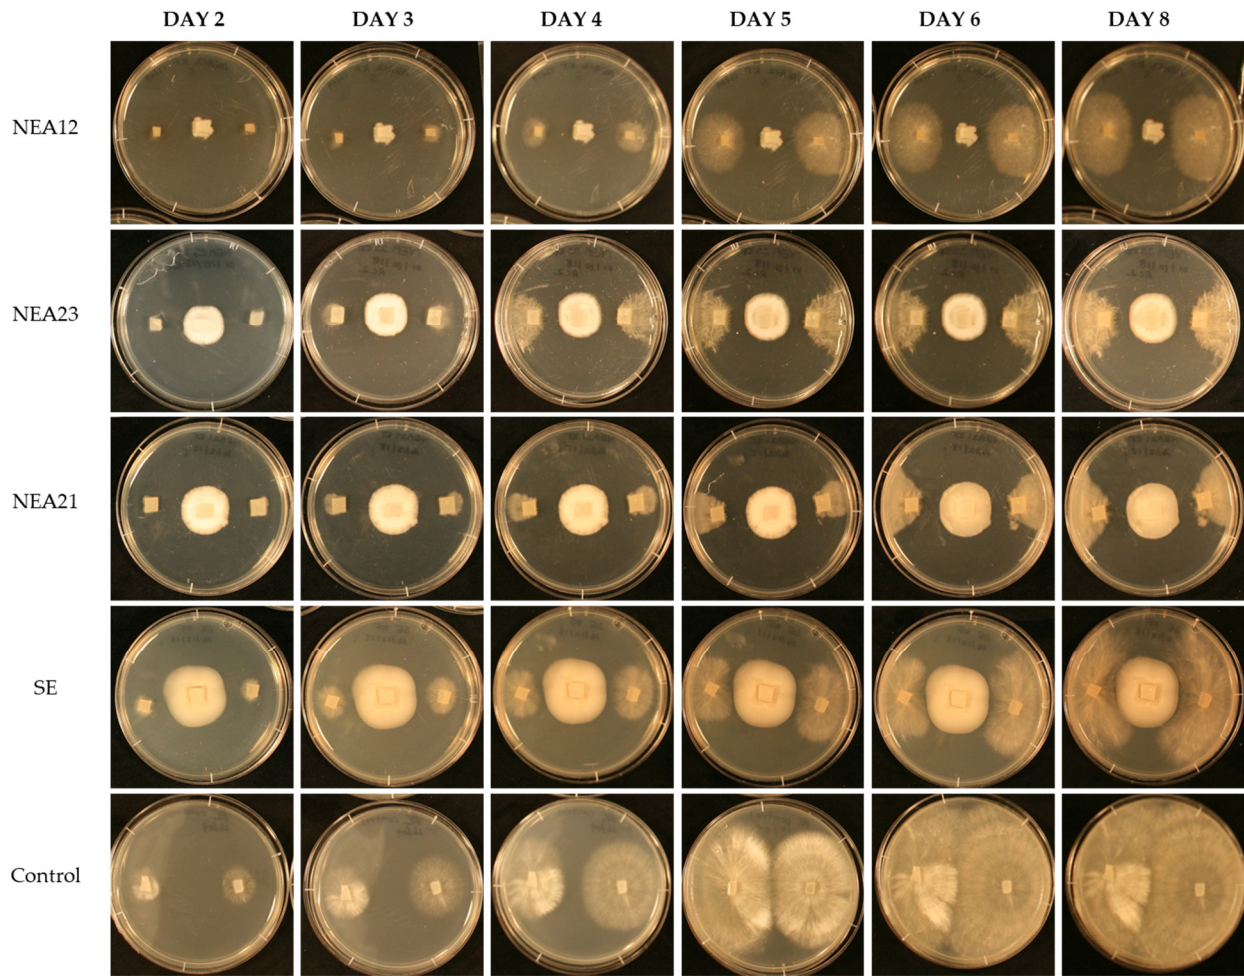

**Figure S1:** Dual culture assay for growth inhibition of pathogens *Ceratobasidium* sp. by four *Epichloë* spp. strains (in rows) NEA12 ( $n=5$ ), NEA23 ( $n=5$ ), NEA21 ( $n=5$ ), positive control SE ( $n=5$ ) and negative control (pathogen alone) ( $n=5$ ). From left to right (in columns) it shows the growth of pathogen from day 2-8. The images are of a typical representative of the 5 replicates.

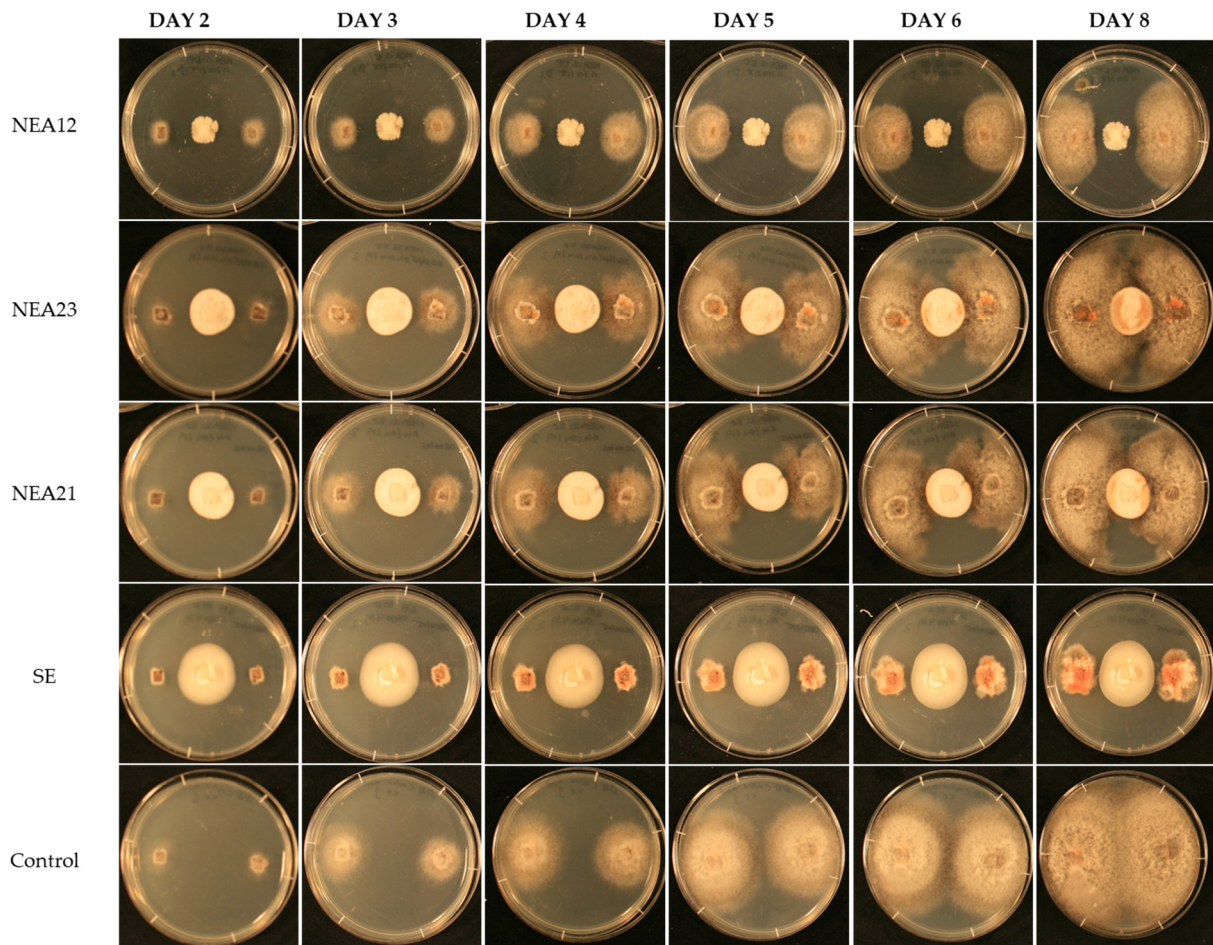

**Figure S2:** Dual culture assay for growth inhibition of pathogens *Drechslera* sp. by four *Epichloë* spp. strains (in rows) NEA12 ( $n=5$ ), NEA23 ( $n=5$ ), NEA21 ( $n=5$ ), positive control SE ( $n=5$ ) and negative control (pathogen alone) ( $n=5$ ). From left to right (in columns) it shows the growth of pathogen from day 2-8. The images are of a typical representative of the 5 replicates.

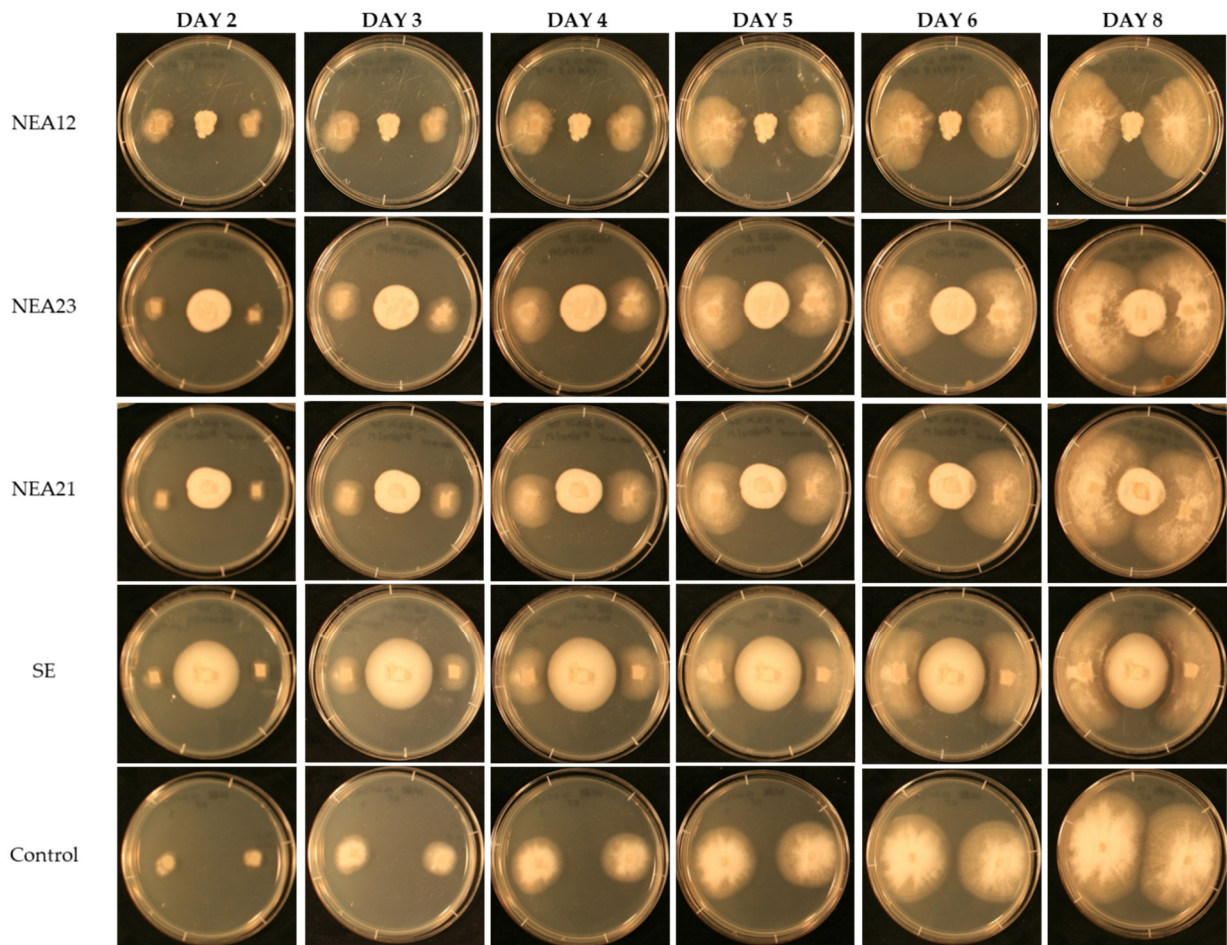

**Figure S3:** Dual culture assay for growth inhibition of pathogens *Fusarium* sp. by four *Epichloë* spp. strains (in rows) NEA12 ( $n=5$ ), NEA23 ( $n=5$ ), NEA21 ( $n=5$ ), positive control SE ( $n=5$ ) and negative control (pathogen alone) ( $n=5$ ). From left to right (in columns) it shows the growth of pathogen from day 2-8. The images are of a typical representative of the 5 replicates.

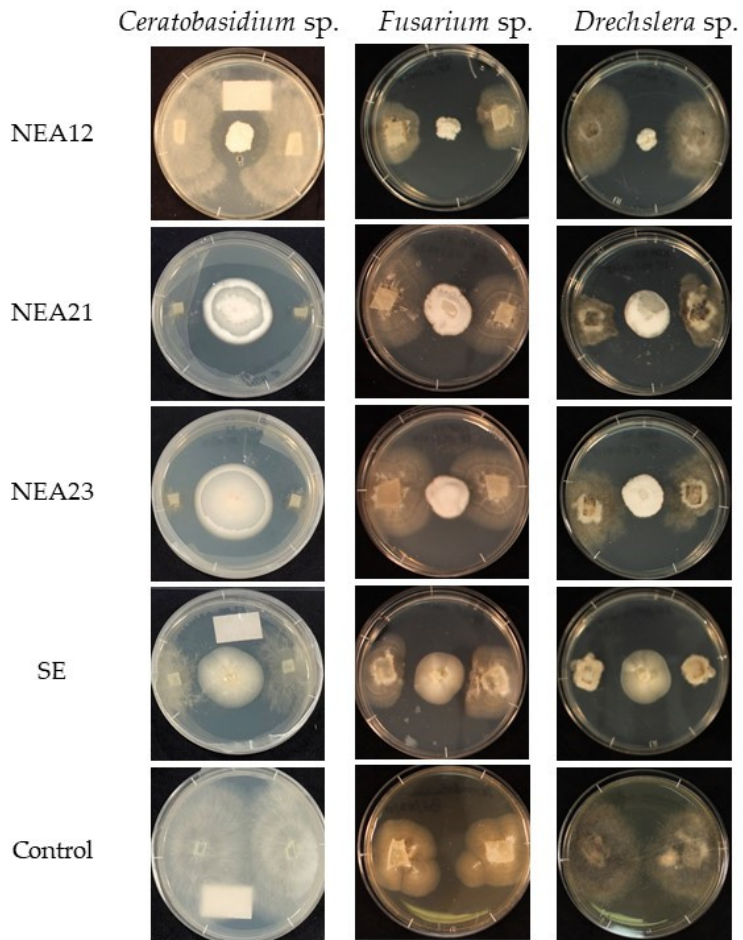

**Figure S4:** Dual culture assay for growth inhibition of pathogens *Ceratobasidium* sp., *Fusarium* sp. and *Drechslera* sp. by four *Epichloë* spp. strains (in rows) NEA12 ( $n=3$ ), NEA23 ( $n=3$ ), NEA21 ( $n=3$ ), SE ( $n=3$ ) and negative control (pathogen alone) ( $n=3$ ).

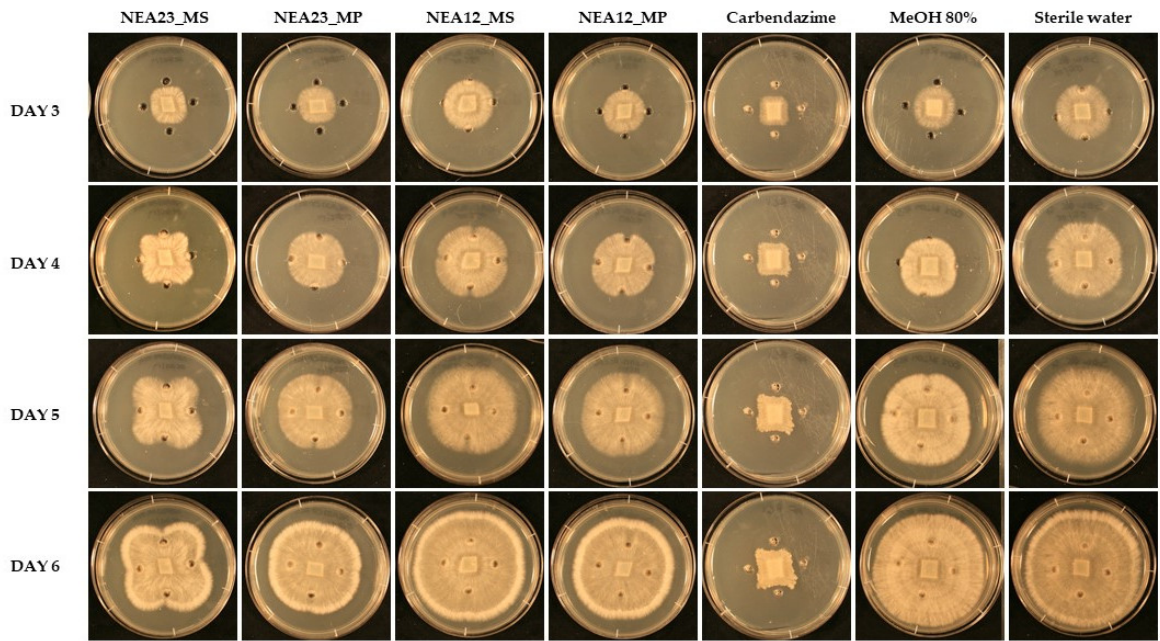

**Figure S5:** Agar-well diffusion assay for pathogens *Ceratobasidium* sp. in the presence of (from left to right): NEA23 MS ( $n=5$ ); NEA23 MP ( $n=5$ ); NEA12 MS ( $n=5$ ); NEA12 MP ( $n=5$ ); antifungal compound carbendazim (1 mg/ml) ( $n=5$ ); 80% methanol ( $n=5$ ); and sterile water ( $n=5$ ). From top to bottom (in rows) it shows the growth of pathogen from day 3-6. The images are of a typical representative of the 5 replicates.

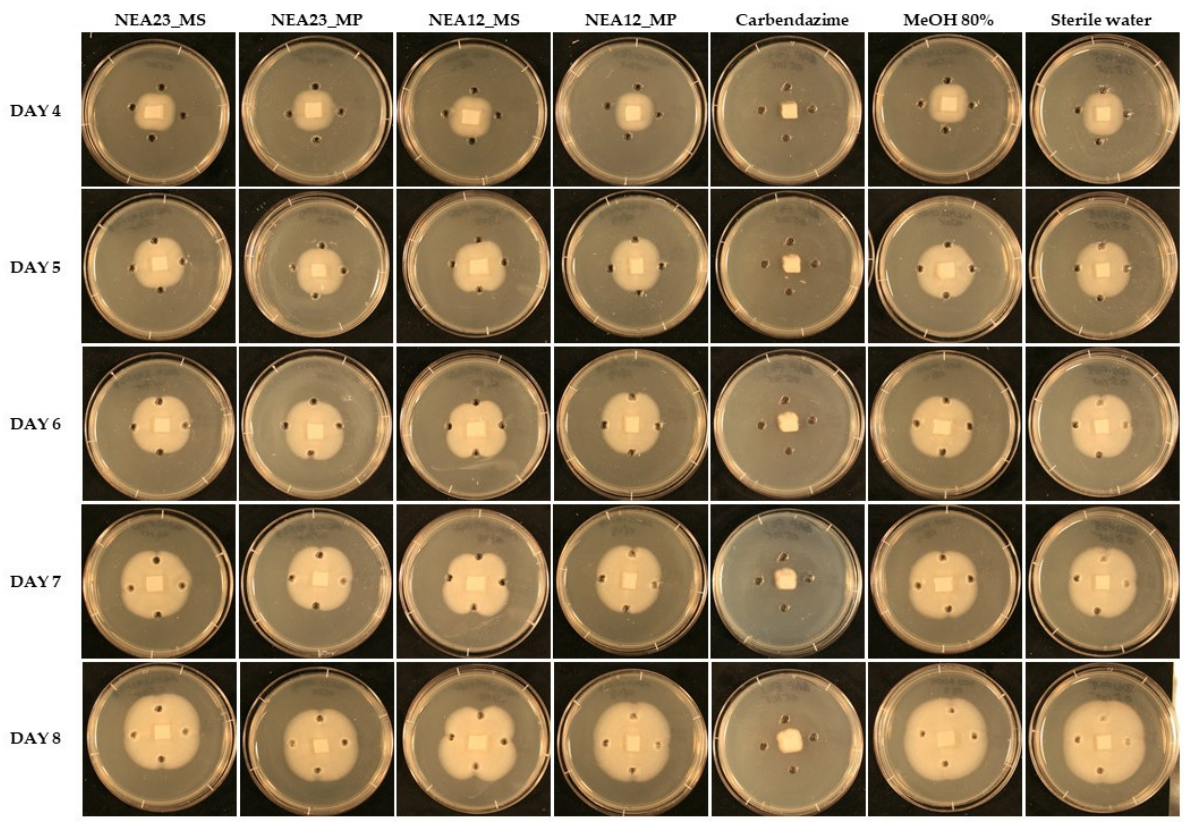

**Figure S6:** Agar-well diffusion assay for pathogens *Fusarium* sp. in the presence of (from left to right): NEA23 MS ( $n=5$ ); NEA23 MP ( $n=5$ ); NEA12 MS ( $n=5$ ); NEA12 MP ( $n=5$ ); antifungal compound carbendazim (1 mg/ml) ( $n=5$ ); 80% methanol ( $n=5$ ); and sterile water ( $n=5$ ). From top to bottom (in rows) it shows the growth of pathogen from day 3-8. The images are of a typical representative of the 5 replicates.

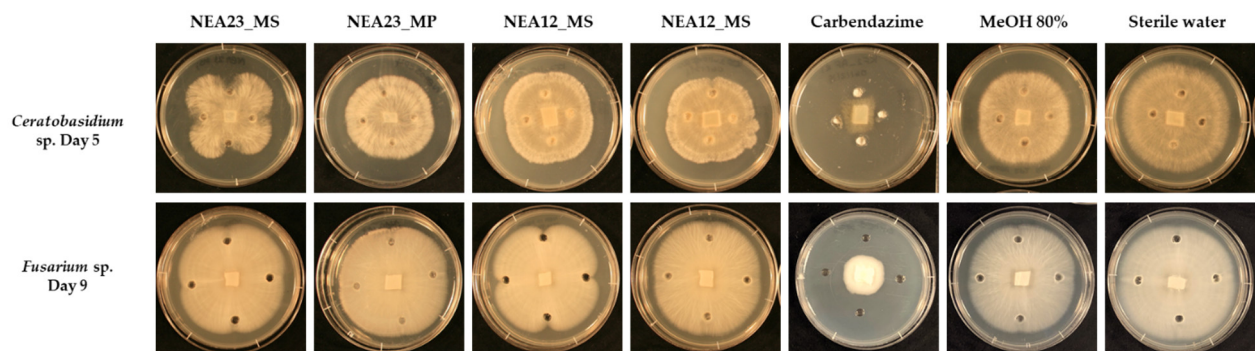

**Figure S7:** Agar-well diffusion assay for pathogens *Ceratobasidium* sp. (top panel) and *Fusarium* sp. (bottom panel) in the presence of (from left to right): NEA23 MS ( $n=5$ ); NEA23 MP ( $n=5$ ); NEA12 MS ( $n=5$ ); NEA12 MP ( $n=5$ ); antifungal compound carbendazim (1 mg/ml) ( $n=5$ ); 80% methanol ( $n=5$ ); and water ( $n=5$ ). The images are of a typical representative of the 5 replicates.

a)

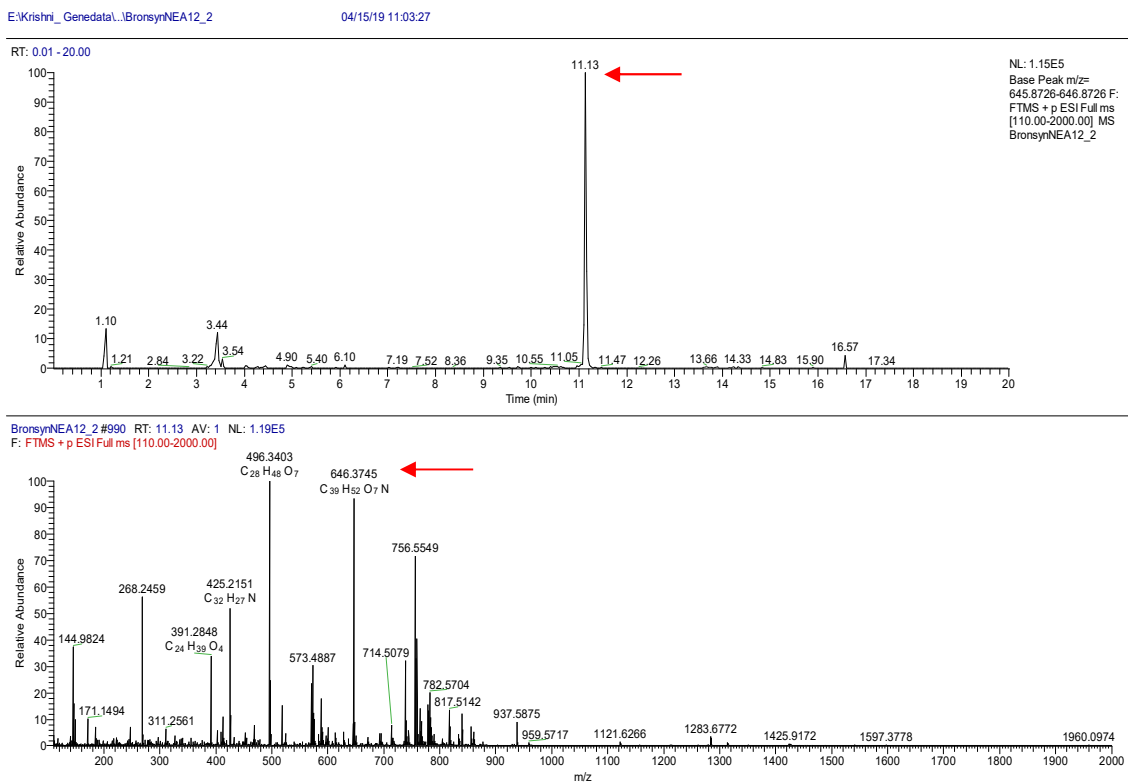

b)

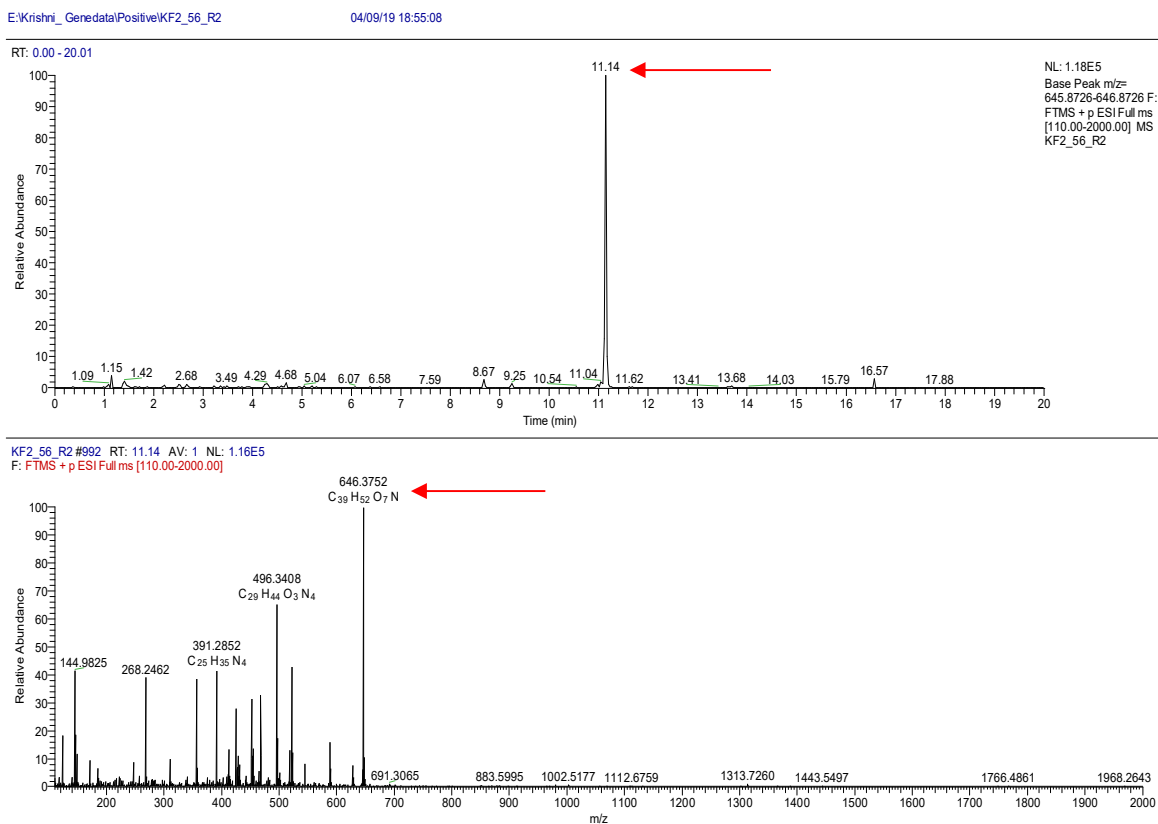

**Figure S8:** LCMS chromatograms of a) NEA12 in planta extract and b) NEA12 fungal culture extract showing the presence of epoxy janthitrem I ( $C_{39}H_{52}O_7N$   $m/z$  = 646.3752  $\Delta$  2.5 ppm) eluting at 11.14 ( $\pm$ 0.02 min) [1].



a)

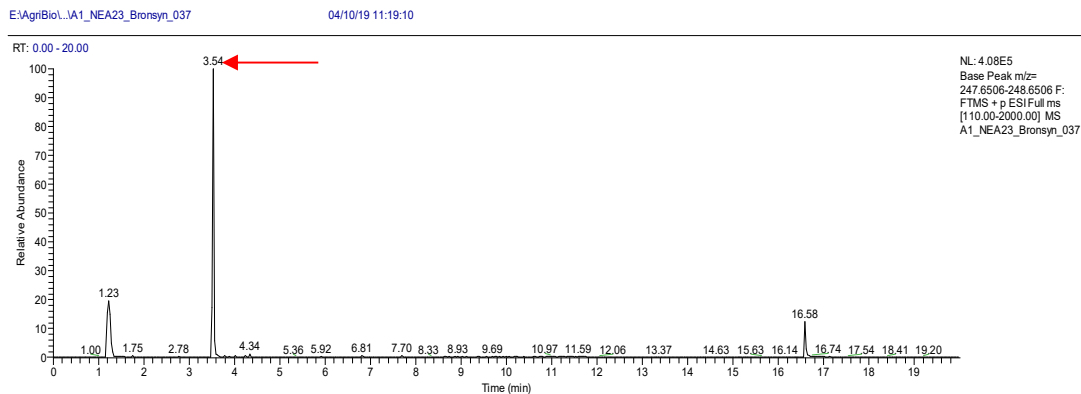

A1\_NEA23\_Bronsyn\_037 #308 RT: 3.54 AV: 1 NL: 4.05E5  
F: FTMS + p ESI Full ms [110.00-2000.00]

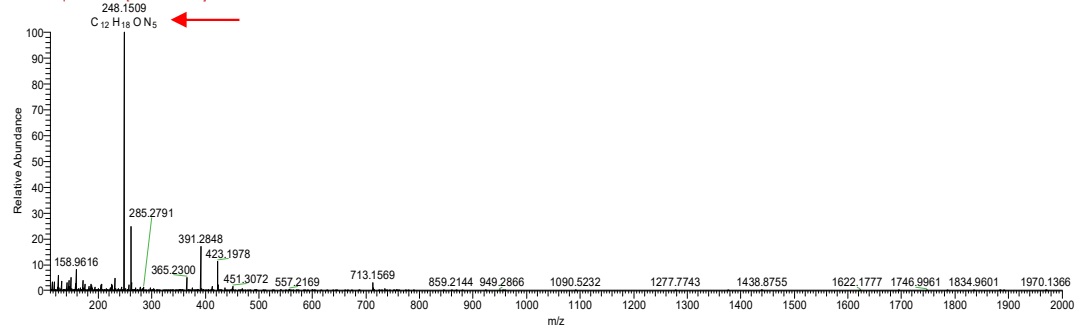

b)

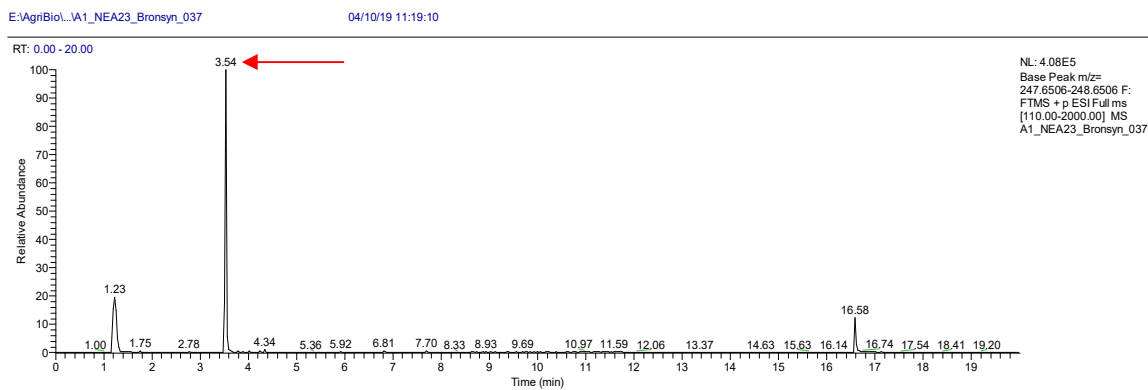

A1\_NEA23\_Bronsyn\_037 #308 RT: 3.54 AV: 1 NL: 4.05E5  
F: FTMS + p ESI Full ms [110.00-2000.00]

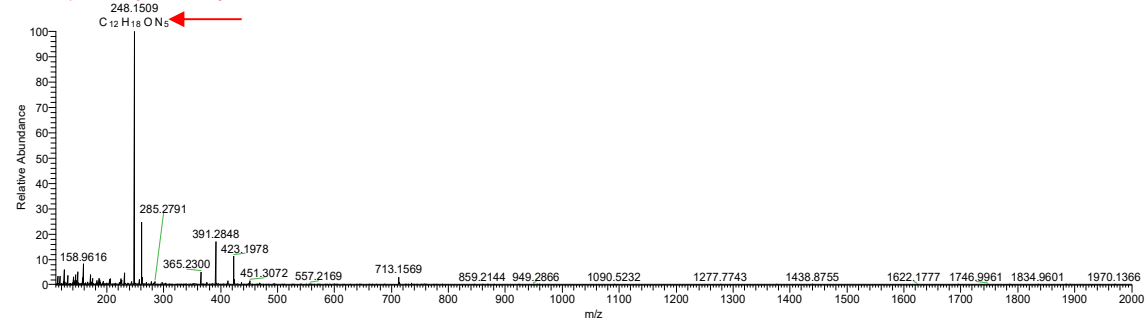

**Figure S9:** LCMS chromatograms of a) 80% methanol extract of perennial ryegrass plants with NEA23 b) 80% methanol extract of 2-week-old NEA23 PDB culture showing the presence of peramine ( $C_{12}H_{18}ON_5$  –  $m/z = 248.1509$ ) eluting at 3.52 ( $\pm 0.02$  min) [2].

1. Ludlow, E.J.; Vassiliadis, S.; Ekanayake, P.N.; Hettiarachchige, I.K.; Reddy, P.; Sawbridge, T.I.; Rochfort, S.J.; Spangenberg, G.C.; Guthridge, K.M. Analysis of the Indole Diterpene Gene Cluster for Biosynthesis of the Epoxy-Janthitrem in *Epichloë Endophytes*. *Microorganisms* **2019**, *7*, 560.
2. Reddy, P.; Deseo, M.A.; Ezernieks, V.; Guthridge, K.; Spangenberg, G.; Rochfort, S. Toxic indole diterpenes from endophyte-infected perennial ryegrass *Lolium perenne* L.: isolation and stability. *Toxins (Basel)* **2019**, *11*, 16.
